# Supplementary material
Source: PubMed Central journal article supplement (PMC8857036)
Supplement: NIHMS1764245-supplement-Supp2.pdf [file NIHMS1764245-supplement-Supp2.pdf]

Supplemental Table 2. Longitudinal studies of symptom clusters in samples of patients who received chemotherapy

| Author, year, purpose and design                                                                                                                                                                                                                         | Sample size, patient characteristics, time of symptom assessment                                                                                                                                                                                                                                                                                                                                                                                                                                                                                                                                                      | Symptom assessment instrument(s), number of symptoms on instrument; statistical analysis method, symptom dimension(s) used to create symptom clusters; analysis of secondary outcomes                                                                                                                                                                                                                                                                                                                                                                                                              | Number of symptom clusters, specific symptoms within each cluster, change in symptom clusters over time<br><br>Evaluation of additional outcomes                                                                                                                                                                                                                                                                                                                                                                                                                                                     | Strengths and Limitations                                                                                                                                                                                                                                                                                                                                                                                     |
|----------------------------------------------------------------------------------------------------------------------------------------------------------------------------------------------------------------------------------------------------------|-----------------------------------------------------------------------------------------------------------------------------------------------------------------------------------------------------------------------------------------------------------------------------------------------------------------------------------------------------------------------------------------------------------------------------------------------------------------------------------------------------------------------------------------------------------------------------------------------------------------------|----------------------------------------------------------------------------------------------------------------------------------------------------------------------------------------------------------------------------------------------------------------------------------------------------------------------------------------------------------------------------------------------------------------------------------------------------------------------------------------------------------------------------------------------------------------------------------------------------|------------------------------------------------------------------------------------------------------------------------------------------------------------------------------------------------------------------------------------------------------------------------------------------------------------------------------------------------------------------------------------------------------------------------------------------------------------------------------------------------------------------------------------------------------------------------------------------------------|---------------------------------------------------------------------------------------------------------------------------------------------------------------------------------------------------------------------------------------------------------------------------------------------------------------------------------------------------------------------------------------------------------------|
| <p>Albusoul et al., 2017</p> <p><u>Purpose(s)</u>:<br/>Identify symptom clusters and their change over time from baseline to after completion of adjuvant breast cancer CTX</p> <p><u>Design</u>: longitudinal</p> <p><u>Location</u>: United States</p> | <p><i>n</i> = 219</p> <p>Mean age: 52.2 (±10.0) years<br/>Range: 29-83 years</p> <p>Female: 100.0%</p> <p>Ethnicity:<br/>Hispanic 3.7%<br/>Non-Hispanic 96.3%</p> <p>Race:<br/>White 95.4%<br/>Non-White 4.6%</p> <p>Employment status:<br/>Employed 75.3%<br/>Non-employed 24.7%</p> <p>Inpatients: NR<br/>Outpatients: NR</p> <p>Diagnosis:<br/>Breast cancer 100.0%</p> <p>Treatment:<br/>Adjuvant CTX 100.0%</p> <p>Time of symptom assessment:<br/>T1: 2 days prior to first CTX (baseline)<br/>T2: first 7 days after cycle 3 CTX<br/>T3: first 7 days after cycle 4 CTX<br/>T4: 30 days after the last CTX</p> | <p><u>Instrument(s)</u>:<br/>HADS – 14 items<br/>SES – 24 items<br/>Medical Outcomes Study Short-Form Survey v2 – 36 items</p> <p><u>Criteria used to exclude symptoms</u>: Yes</p> <p><u>Analysis</u>: EFA</p> <p><u>Dimension(s)</u>: severity</p> <p><u>Symptoms allowed to load on more than one factor</u>: NR</p> <p><u>Minimum factor loadings required to include symptom within cluster</u>: 0.30</p> <p><u>Method of evaluating for stability of symptoms across symptom dimensions and/or timepoints</u>: Investigator appraisal</p> <p><u>Analysis of secondary outcomes</u>: None</p> | <p>2 symptom clusters identified at each timepoint:</p> <p><b>T1</b><br/><u>Treatment-related symptom cluster</u>:<br/>sleep disturbance, concentration, anxiety, appearance</p> <p><u>GI symptom cluster</u>:<br/>nausea, appetite, bowel pattern, pain, fatigue</p> <p><b>T2</b><br/><u>Treatment-related symptom cluster</u>:<br/>sleep disturbance, pain, fatigue, bowel pattern, concentration, appearance, anxiety, depression</p> <p><u>GI symptom cluster</u>:<br/>nausea, appetite</p> <p><b>T3</b><br/><u>Treatment-related symptom cluster</u>:<br/>fatigue, appetite, concentration,</p> | <p><u>Strengths</u>:</p> <p>Evaluated for symptom clusters across multiple timepoints</p> <p>Utilized valid and reliable symptom measures</p> <p><u>Limitations</u>:</p> <p>Evaluated for symptom clusters with only 10 symptoms</p> <p>Used a single dimension to evaluate for symptom clusters</p> <p>Removed symptom clusters that were not reliable</p> <p>Primarily a non-Hispanic, Caucasian sample</p> |

|                                                                                                                                                                                           |                                                                                                                                                                 |                                                                                                                                                                                     |                                                                                                                                                                                                                                                                                                                                                                                                                                                                                                                                                                                                                                                                       |                                                                                                                                                                          |
|-------------------------------------------------------------------------------------------------------------------------------------------------------------------------------------------|-----------------------------------------------------------------------------------------------------------------------------------------------------------------|-------------------------------------------------------------------------------------------------------------------------------------------------------------------------------------|-----------------------------------------------------------------------------------------------------------------------------------------------------------------------------------------------------------------------------------------------------------------------------------------------------------------------------------------------------------------------------------------------------------------------------------------------------------------------------------------------------------------------------------------------------------------------------------------------------------------------------------------------------------------------|--------------------------------------------------------------------------------------------------------------------------------------------------------------------------|
|                                                                                                                                                                                           |                                                                                                                                                                 |                                                                                                                                                                                     | <p>appearance, anxiety, depression</p> <p><u>GI symptom cluster:</u><br/>nausea, bowel pattern, sleep disturbance, pain</p> <p><b>T4</b><br/><u>Treatment-related symptom cluster 1:</u><br/>fatigue, sleep disturbance, pain</p> <p><u>Treatment-related symptom cluster 2:</u><br/>concentration, appearance, anxiety</p> <p><u>Changes in symptom clusters over time:</u></p> <p>T2 and T3 were assessed to evaluate stability of symptom clusters. Symptom clusters appear to be dynamic and change over time</p> <p>GI symptom cluster disappeared at T4. However, a second treatment-related symptom cluster emerged</p> <p><u>Additional outcomes:</u> N/A</p> |                                                                                                                                                                          |
| <p>Berger et al., 2020</p> <p><u>Purpose(s):</u><br/>Identify the prevalence and severity of individual symptoms, symptom clusters, and QOL in women receiving adjuvant breast cancer</p> | <p><i>n</i> = 219</p> <p>Mean age: 52.2 (±10) years<br/>Range: 29-83 years</p> <p>Female: 100.0%</p> <p>Ethnicity:<br/>Hispanic 3.7%<br/>Non-Hispanic 96.3%</p> | <p><u>Instrument(s):</u><br/>HADS – 14 items<br/>SES – 24 items<br/>Medical Outcomes Study Short-Form Survey v2 – 36 items</p> <p><u>Criteria used to exclude symptoms:</u> Yes</p> | <p>2 symptom clusters identified at each timepoint:</p> <p><b>T1</b><br/><u>Treatment-related symptom cluster:</u><br/>sleep disturbance, concentration, anxiety</p>                                                                                                                                                                                                                                                                                                                                                                                                                                                                                                  | <p><u>Strengths:</u></p> <p>Evaluated for symptom clusters across multiple timepoints</p> <p>Utilized valid and reliable symptom measures</p> <p><u>Limitations:</u></p> |

|                                                                                                               |                                                                                                                                                                                                                                                                                                                                                                                                                                                                                                       |                                                                                                                                                                                                                                                                                                                                                                                                                    |                                                                                                                                                                                                                                                                                                                                                                                                                                                                                                                                                                                                                                                                                                                                                                                                                                                                      |                                                                                                                                                                                                                                                              |
|---------------------------------------------------------------------------------------------------------------|-------------------------------------------------------------------------------------------------------------------------------------------------------------------------------------------------------------------------------------------------------------------------------------------------------------------------------------------------------------------------------------------------------------------------------------------------------------------------------------------------------|--------------------------------------------------------------------------------------------------------------------------------------------------------------------------------------------------------------------------------------------------------------------------------------------------------------------------------------------------------------------------------------------------------------------|----------------------------------------------------------------------------------------------------------------------------------------------------------------------------------------------------------------------------------------------------------------------------------------------------------------------------------------------------------------------------------------------------------------------------------------------------------------------------------------------------------------------------------------------------------------------------------------------------------------------------------------------------------------------------------------------------------------------------------------------------------------------------------------------------------------------------------------------------------------------|--------------------------------------------------------------------------------------------------------------------------------------------------------------------------------------------------------------------------------------------------------------|
| <p>CTX from baseline over 1 year</p> <p><u>Design:</u> longitudinal</p> <p><u>Location:</u> United States</p> | <p><u>Race:</u><br/>White 95.4%<br/>Non-White 4.6%</p> <p><u>Employment status:</u><br/>Employed 75.3%<br/>Non-employed 24.7%</p> <p><u>Inpatients:</u> NR<br/><u>Outpatients:</u> NR</p> <p><u>Diagnosis:</u><br/>Breast Cancer 100.0%</p> <p><u>Treatment:</u><br/>Adjuvant CTX 100.0%</p> <p><u>Time of symptom assessment:</u><br/>T1: 2 days prior to first CTX (baseline)<br/>T2: 6 months after baseline (1 month after last CTX)<br/>T3: 1 year after baseline (~6 months after last CTX)</p> | <p><u>Analysis:</u> EFA</p> <p><u>Dimension(s):</u> severity</p> <p><u>Symptoms allowed to load on more than one factor:</u><br/>Yes</p> <p><u>Minimum factor loadings required to include symptom within cluster:</u> 0.30</p> <p><u>Method of evaluating for stability of symptoms across symptom dimensions and/or timepoints:</u> Investigator appraisal</p> <p><u>Analysis of secondary outcomes:</u> QOL</p> | <p><u>GI symptom cluster:</u><br/>fatigue, pain, bowel pattern, nausea</p> <p><b>T2</b><br/><u>Treatment-related symptom cluster:</u><br/>fatigue, sleep disturbance, pain, concentration</p> <p><u>GI symptom cluster:</u><br/>concentration, appearance, anxiety</p> <p><b>T3</b><br/><u>Treatment-related symptom cluster:</u><br/>fatigue, sleep disturbance, pain, concentration, anxiety</p> <p><u>GI symptom cluster:</u><br/>pain, bowel pattern</p> <p><u>Changes in symptom clusters over time:</u></p> <p>Treatment-related symptom cluster was identified across all timepoints with a basis of two core symptom. However, the number of symptoms increased across timepoints</p> <p><u>Additional outcomes:</u></p> <p>At all timepoints, physical component scores were the lowest and were lower than the population norms (<math>\leq 50</math>)</p> | <p>Evaluated for symptom clusters with only 10 symptoms</p> <p>Used a single dimension to evaluate for symptom clusters</p> <p>Did not relate changes in QOL to the dynamic nature of symptom clusters</p> <p>Primarily a non-Hispanic, Caucasian sample</p> |
|---------------------------------------------------------------------------------------------------------------|-------------------------------------------------------------------------------------------------------------------------------------------------------------------------------------------------------------------------------------------------------------------------------------------------------------------------------------------------------------------------------------------------------------------------------------------------------------------------------------------------------|--------------------------------------------------------------------------------------------------------------------------------------------------------------------------------------------------------------------------------------------------------------------------------------------------------------------------------------------------------------------------------------------------------------------|----------------------------------------------------------------------------------------------------------------------------------------------------------------------------------------------------------------------------------------------------------------------------------------------------------------------------------------------------------------------------------------------------------------------------------------------------------------------------------------------------------------------------------------------------------------------------------------------------------------------------------------------------------------------------------------------------------------------------------------------------------------------------------------------------------------------------------------------------------------------|--------------------------------------------------------------------------------------------------------------------------------------------------------------------------------------------------------------------------------------------------------------|

|                                                                                                                                                                                                                                              |                                                                                                                                                                                                                                                                                                                                                                                                                                                                                       |                                                                                                                                                                                                                                                                                                                                                                                                                                                                                                                                                                                                              |                                                                                                                                                                                                                                                                                                                                                                                                                                                                                                                                                                                                                                                                                                                                                                                                                                                                                             |                                                                                                                                                                                                                                                                                                                                                                                                                                                                                             |
|----------------------------------------------------------------------------------------------------------------------------------------------------------------------------------------------------------------------------------------------|---------------------------------------------------------------------------------------------------------------------------------------------------------------------------------------------------------------------------------------------------------------------------------------------------------------------------------------------------------------------------------------------------------------------------------------------------------------------------------------|--------------------------------------------------------------------------------------------------------------------------------------------------------------------------------------------------------------------------------------------------------------------------------------------------------------------------------------------------------------------------------------------------------------------------------------------------------------------------------------------------------------------------------------------------------------------------------------------------------------|---------------------------------------------------------------------------------------------------------------------------------------------------------------------------------------------------------------------------------------------------------------------------------------------------------------------------------------------------------------------------------------------------------------------------------------------------------------------------------------------------------------------------------------------------------------------------------------------------------------------------------------------------------------------------------------------------------------------------------------------------------------------------------------------------------------------------------------------------------------------------------------------|---------------------------------------------------------------------------------------------------------------------------------------------------------------------------------------------------------------------------------------------------------------------------------------------------------------------------------------------------------------------------------------------------------------------------------------------------------------------------------------------|
|                                                                                                                                                                                                                                              |                                                                                                                                                                                                                                                                                                                                                                                                                                                                                       |                                                                                                                                                                                                                                                                                                                                                                                                                                                                                                                                                                                                              | QOL scores significantly improved over time                                                                                                                                                                                                                                                                                                                                                                                                                                                                                                                                                                                                                                                                                                                                                                                                                                                 |                                                                                                                                                                                                                                                                                                                                                                                                                                                                                             |
| <p>Browall et al., 2017</p> <p><u>Purpose(s)</u>: Describe symptom clusters at four points in time during CTX treatment in patients with stage I to IIIa breast cancer</p> <p><u>Design</u>: longitudinal</p> <p><u>Location</u>: Sweden</p> | <p><math>n = 124</math></p> <p>Mean age: 59 years<br/>Range: 34-79 years</p> <p>Female: 100.0%</p> <p>Ethnicity: NR</p> <p>Race: NR</p> <p>Employment status: NR</p> <p>Inpatients: NR<br/>Outpatients: NR</p> <p>Diagnosis:<br/>Breast cancer 100.0%</p> <p>Treatment:<br/>Adjuvant CTX 100%</p> <p>Timepoints of symptom assessment:<br/>T1: Enrollment (baseline)<br/>T2: Day 12 post cycle 1 FEC<br/>T3: Day 12 post cycle 3 FEC<br/>T4: Day 12 post final cycle of docetaxel</p> | <p><u>Instrument(s)</u>: MSAS: 32 symptoms</p> <p><u>Criteria used to exclude symptoms</u>: Yes</p> <p><u>Analysis</u>: PCA</p> <p><u>Dimension(s)</u>: symptom burden summary score (calculated as the average of the frequency, severity, and distress scores for each symptom)</p> <p><u>Symptoms allowed to load on more than one factor</u>: NR</p> <p><u>Minimum factor loadings required to include symptom within cluster</u>: NR</p> <p><u>Method of evaluating for stability of symptoms across symptom dimensions and/or timepoints</u>: NR</p> <p><u>Analysis of secondary outcomes</u>: N/A</p> | <p>3 symptom clusters identified across all timepoints:</p> <p><b>T1</b><br/><u>Emotional cluster</u>: worrying, difficulty concentrating, feeling sad</p> <p><u>Gastro cluster</u>: taste change, constipation, diarrhea</p> <p><u>Physical cluster</u>: breathlessness, dizziness, dry mouth, nausea</p> <p><b>T2</b><br/><u>Emotional cluster</u>: feeling sad, worrying, difficulty concentrating</p> <p><u>Gastro cluster</u>: lack of appetite, taste change, constipation, diarrhea</p> <p><u>Physical cluster</u>: hair loss, breathlessness, dizziness, dry mouth, nausea</p> <p><b>T3</b><br/><u>Physical cluster</u>: lack of appetite, breathlessness, feeling nervous, lack of energy, feeling irritable, dizziness, nausea</p> <p><u>Emotional cluster</u>: worrying, feeling sad, difficulty concentrating</p> <p><u>Gastro cluster</u>: mouth sores, dry mouth, lack of</p> | <p><u>Strengths</u>:</p> <p>Evaluated for symptom clusters across multiple timepoints</p> <p>Symptom clusters were created using multiple dimensions of the symptom experience</p> <p>Utilized a valid and reliable symptom assessment inventory</p> <p><u>Limitations</u>:</p> <p>Relatively small sample size</p> <p>Did not use a method to assess for stability of symptoms across timepoints</p> <p>Did not define time of enrollment in relationship to the administration of CTX</p> |

|                                                                                                                                                  |                                                                                                                     |                                                                                                                                            |                                                                                                                                                                                                                                                                                                                                                                                                                                                                                                                                                                                                                                                                                                                                                                                        |                                                                                           |
|--------------------------------------------------------------------------------------------------------------------------------------------------|---------------------------------------------------------------------------------------------------------------------|--------------------------------------------------------------------------------------------------------------------------------------------|----------------------------------------------------------------------------------------------------------------------------------------------------------------------------------------------------------------------------------------------------------------------------------------------------------------------------------------------------------------------------------------------------------------------------------------------------------------------------------------------------------------------------------------------------------------------------------------------------------------------------------------------------------------------------------------------------------------------------------------------------------------------------------------|-------------------------------------------------------------------------------------------|
|                                                                                                                                                  |                                                                                                                     |                                                                                                                                            | <p>appetite, taste change, constipation, diarrhea</p> <p><b>T4</b><br/> <u>Emotional cluster</u>: feeling nervous, worrying, feeling sad, difficulty concentrating</p> <p><u>Gastro cluster</u>: lack of appetite, taste change, constipation, diarrhea</p> <p><u>Physical cluster</u>: sexual relations, sweats, difficulty sleeping, lack of appetite, breathlessness, feeling nervous, lack of energy, feeling irritable, dizziness, nausea</p> <p><u>Changes in symptom clusters over time</u>:</p> <p>Symptom clusters at the first treatment cycle were quite stable and similar to baseline</p> <p>Order of symptoms changed at cycle 3</p> <p>Symptom clusters remained relatively stable across time with a basis of core symptoms</p> <p><u>Additional outcomes</u>: N/A</p> |                                                                                           |
| <p>Han et al., 2019</p> <p><u>Purpose(s)</u>:<br/> Evaluated the occurrence, severity, and distress of 38 symptoms prior to patients' second</p> | <p><math>n = 399</math></p> <p>Mean age: 57.9 (<math>\pm 11.8</math>) years<br/> Range: NR</p> <p>Female: 45.1%</p> | <p><u>Instrument(s)</u>: MSAS (modified): 38 symptoms</p> <p><u>Criteria used to exclude symptoms</u>: Yes</p> <p><u>Analysis</u>: EFA</p> | <p>4 symptom clusters identified across the symptom dimensions and timepoints:</p> <p><i>Occurrence symptom clusters</i></p>                                                                                                                                                                                                                                                                                                                                                                                                                                                                                                                                                                                                                                                           | <p><u>Strengths</u>:</p> <p>Evaluated for symptom clusters across multiple timepoints</p> |

|                                                                                                                                                                                                                                                                                                                                                                                                                                        |                                                                                                                                                                                                                                                                                                                                                                                                                                                                                                                                                                                                                                                                                                                                                     |                                                                                                                                                                                                                                                                                                                                                                                                                |                                                                                                                                                                                                                                                                                                                                                                                                                                                                                                                                                                                                                                                                                                                                                                                                                                                                                                                                                                        |                                                                                                                                                                                                                                                                                                    |
|----------------------------------------------------------------------------------------------------------------------------------------------------------------------------------------------------------------------------------------------------------------------------------------------------------------------------------------------------------------------------------------------------------------------------------------|-----------------------------------------------------------------------------------------------------------------------------------------------------------------------------------------------------------------------------------------------------------------------------------------------------------------------------------------------------------------------------------------------------------------------------------------------------------------------------------------------------------------------------------------------------------------------------------------------------------------------------------------------------------------------------------------------------------------------------------------------------|----------------------------------------------------------------------------------------------------------------------------------------------------------------------------------------------------------------------------------------------------------------------------------------------------------------------------------------------------------------------------------------------------------------|------------------------------------------------------------------------------------------------------------------------------------------------------------------------------------------------------------------------------------------------------------------------------------------------------------------------------------------------------------------------------------------------------------------------------------------------------------------------------------------------------------------------------------------------------------------------------------------------------------------------------------------------------------------------------------------------------------------------------------------------------------------------------------------------------------------------------------------------------------------------------------------------------------------------------------------------------------------------|----------------------------------------------------------------------------------------------------------------------------------------------------------------------------------------------------------------------------------------------------------------------------------------------------|
| <p>or third cycle of CTX (time 1), approximately one week after CTX (time 2), and approximately two weeks after CTX (time 3)</p> <p>Evaluated for differences in the number and types of symptom clusters at each of these assessments using ratings of occurrence, severity, and distress</p> <p>Evaluated for changes in the symptom clusters over time</p> <p><u>Design</u>: longitudinal</p> <p><u>Location</u>: United States</p> | <p><b>Ethnicity and Race:</b><br/> White 68.7%<br/> Black 9.0%<br/> Asian or Pacific Islander 11.5%<br/> Hispanic, Mixed, or Other 10.8%</p> <p><b>Employment status:</b><br/> Working 33.3%<br/> Not working 66.7%</p> <p>Inpatients: <i>n</i> = 0<br/> Outpatients: <i>n</i> = 399</p> <p><b>Diagnosis:</b><br/> Colon 46.4%<br/> Rectal 20.1%<br/> Pancreatic 18.5%<br/> Esophageal 5.3%<br/> Gastric 4.8%<br/> Gallbladder/bile duct 2.5%<br/> Liver 1.5%<br/> Small intestine 1.5%<br/> Anal 1.3%<br/> Other 6.3%</p> <p><b>Treatment:</b><br/> CTX 100.0%</p> <p><b>Timepoints of symptom assessment:</b><br/> T1: prior to second or third cycle of CTX<br/> T2: approximately 1 week after CTX<br/> T3: approximately 2 weeks after CTX</p> | <p><u>Dimension(s)</u>: occurrence, severity, distress</p> <p><u>Symptoms allowed to load on more than one factor</u>:<br/> Yes</p> <p><u>Minimum factor loadings required to include symptom within cluster</u>: 0.40</p> <p><u>Method of evaluating for stability of symptoms across symptom dimensions and/or timepoints</u>: Kirkova and Walsh, 2007</p> <p><u>Analysis of secondary outcomes</u>: N/A</p> | <p><b>T1</b><br/> <u>Psychological cluster</u>: lack of energy, difficulty concentrating, feeling nervous, feeling drowsy, feeling sad, worrying, feeling irritable, changes in skin</p> <p><u>CTX-related cluster</u>: dry mouth, nausea, itching, lack of appetite, weight loss, change in the way food tastes, changes in skin, dizziness</p> <p><u>GI cluster</u>: feeling bloated, abdominal cramps, constipation</p> <p><u>Weight change cluster</u>: increased appetite, weight gain</p> <p><b>T2</b><br/> <u>Psychological cluster</u>: lack of energy, difficulty concentrating, feeling nervous, feeling sad, worrying, feeling irritable, problems with sexual interest or activity, "I don't look like myself"</p> <p><u>CTX-related cluster</u>: dry mouth, nausea, lack of appetite, weight loss, change in the way food tastes, cough, lack of energy, abdominal cramps, feeling bloated, diarrhea, feeling drowsy, numbness/tingling in hands/feet</p> | <p>Symptom clusters were created using multiple dimensions of the symptom experience</p> <p>Evaluated symptom clusters in patients with gastrointestinal cancers</p> <p>Utilized a valid and reliable symptom inventory</p> <p><u>Limitations</u>:</p> <p>Heterogeneity in types of GI cancers</p> |
|----------------------------------------------------------------------------------------------------------------------------------------------------------------------------------------------------------------------------------------------------------------------------------------------------------------------------------------------------------------------------------------------------------------------------------------|-----------------------------------------------------------------------------------------------------------------------------------------------------------------------------------------------------------------------------------------------------------------------------------------------------------------------------------------------------------------------------------------------------------------------------------------------------------------------------------------------------------------------------------------------------------------------------------------------------------------------------------------------------------------------------------------------------------------------------------------------------|----------------------------------------------------------------------------------------------------------------------------------------------------------------------------------------------------------------------------------------------------------------------------------------------------------------------------------------------------------------------------------------------------------------|------------------------------------------------------------------------------------------------------------------------------------------------------------------------------------------------------------------------------------------------------------------------------------------------------------------------------------------------------------------------------------------------------------------------------------------------------------------------------------------------------------------------------------------------------------------------------------------------------------------------------------------------------------------------------------------------------------------------------------------------------------------------------------------------------------------------------------------------------------------------------------------------------------------------------------------------------------------------|----------------------------------------------------------------------------------------------------------------------------------------------------------------------------------------------------------------------------------------------------------------------------------------------------|

|  |  |  |                                                                                                                                                                                                                                                                                                                                                                                                                                                                                                                                                                                                                                                                                                                                                                                                                                                                                                                                                                                                                                       |  |
|--|--|--|---------------------------------------------------------------------------------------------------------------------------------------------------------------------------------------------------------------------------------------------------------------------------------------------------------------------------------------------------------------------------------------------------------------------------------------------------------------------------------------------------------------------------------------------------------------------------------------------------------------------------------------------------------------------------------------------------------------------------------------------------------------------------------------------------------------------------------------------------------------------------------------------------------------------------------------------------------------------------------------------------------------------------------------|--|
|  |  |  | <p><u>Weight change cluster:</u><br/>increased appetite, weight gain, lack of appetite</p> <p><u>Epithelial cluster:</u> hair loss, change in the way food tastes, changes in skin</p> <p><b>T3</b></p> <p><u>Psychological cluster:</u><br/>lack of energy, difficulty concentrating, feeling nervous, feeling sad, worrying, feeling irritable, problems with sexual interest or activity, difficulty sleeping</p> <p><u>CTX-related cluster:</u> dry mouth, nausea, lack of appetite, weight loss, change in the way food tastes, cough, lack of energy, abdominal cramps, diarrhea, feeling drowsy</p> <p><u>Weight change cluster:</u><br/>increased appetite, weight gain, lack of appetite, weight loss</p> <p><u>Epithelial cluster:</u> changes in skin, itching, "I don't look like myself"</p> <p><i>Severity symptom clusters</i></p> <p><b>T1</b></p> <p><u>Psychological cluster:</u> lack of energy, difficulty concentrating, feeling nervous, feeling drowsy, feeling sad, worrying, feeling irritable, problems</p> |  |
|--|--|--|---------------------------------------------------------------------------------------------------------------------------------------------------------------------------------------------------------------------------------------------------------------------------------------------------------------------------------------------------------------------------------------------------------------------------------------------------------------------------------------------------------------------------------------------------------------------------------------------------------------------------------------------------------------------------------------------------------------------------------------------------------------------------------------------------------------------------------------------------------------------------------------------------------------------------------------------------------------------------------------------------------------------------------------|--|

|  |  |  |                                                                                                                                                                                                                                                                                                                                                                                                                                                                                                                                                                                                                                                                                                                                                                                                                                                                                                                                             |  |
|--|--|--|---------------------------------------------------------------------------------------------------------------------------------------------------------------------------------------------------------------------------------------------------------------------------------------------------------------------------------------------------------------------------------------------------------------------------------------------------------------------------------------------------------------------------------------------------------------------------------------------------------------------------------------------------------------------------------------------------------------------------------------------------------------------------------------------------------------------------------------------------------------------------------------------------------------------------------------------|--|
|  |  |  | <p>with sexual interest or activity</p> <p><u>CTX-related cluster:</u><br/>itching, lack of appetite, weight loss, change in the way food tastes, changes in skin, dizziness, hair loss, "I don't look like myself"</p> <p><u>GI cluster:</u> feeling bloated, abdominal cramps, nausea, diarrhea</p> <p><u>Weight change cluster:</u><br/>increased appetite, weight gain</p> <p><b>T2</b></p> <p><u>Psychological cluster:</u> lack of energy, difficulty concentrating, feeling nervous, feeling sad, worrying, feeling irritable, problems with sexual interest or activity</p> <p><u>CTX-related cluster:</u> dry mouth, nausea, lack of appetite, weight loss, change in the way food tastes, cough, lack of energy, abdominal cramps, feeling bloated, diarrhea, feeling drowsy, numbness/tingling in hands/feet, sweats</p> <p><u>Weight change cluster:</u><br/>increased appetite, weight gain, lack of appetite, weight loss</p> |  |
|--|--|--|---------------------------------------------------------------------------------------------------------------------------------------------------------------------------------------------------------------------------------------------------------------------------------------------------------------------------------------------------------------------------------------------------------------------------------------------------------------------------------------------------------------------------------------------------------------------------------------------------------------------------------------------------------------------------------------------------------------------------------------------------------------------------------------------------------------------------------------------------------------------------------------------------------------------------------------------|--|



|  |  |  |                                                                                                                                                                                                                                                                                                                                                                                                                                                                                                                                                                                                                                                                                                                                                                                                                                                                                                                                                                                                                                                      |  |
|--|--|--|------------------------------------------------------------------------------------------------------------------------------------------------------------------------------------------------------------------------------------------------------------------------------------------------------------------------------------------------------------------------------------------------------------------------------------------------------------------------------------------------------------------------------------------------------------------------------------------------------------------------------------------------------------------------------------------------------------------------------------------------------------------------------------------------------------------------------------------------------------------------------------------------------------------------------------------------------------------------------------------------------------------------------------------------------|--|
|  |  |  | <p><u>Epithelial cluster</u>: hair loss, changes in skin, itching, "I don't look like myself"</p> <p><b>T3</b></p> <p><u>Psychological cluster</u>: lack of energy, difficulty concentrating, feeling nervous, feeling sad, worrying, feeling irritable, constipation</p> <p><u>CTX-related cluster</u>: dry mouth, nausea, lack of appetite, weight loss, change in the way food tastes, dizziness, cough, lack of energy, abdominal cramps, diarrhea, feeling drowsy, numbness/tingling in hands/feet</p> <p><u>Weight change cluster</u>: increased appetite, weight gain, lack of appetite, weight loss</p> <p><u>Epithelial cluster</u>: changes in skin, itching, "I don't look like myself"</p> <p><i>Distress symptom clusters</i></p> <p><b>T1</b></p> <p><u>Psychological cluster</u>: lack of energy, difficulty concentrating, feeling nervous, feeling drowsy, feeling sad, worrying, feeling irritable, difficulty sleeping, pain, sweats</p> <p><u>CTX-related cluster</u>: itching, lack of appetite, weight loss, change in the</p> |  |
|--|--|--|------------------------------------------------------------------------------------------------------------------------------------------------------------------------------------------------------------------------------------------------------------------------------------------------------------------------------------------------------------------------------------------------------------------------------------------------------------------------------------------------------------------------------------------------------------------------------------------------------------------------------------------------------------------------------------------------------------------------------------------------------------------------------------------------------------------------------------------------------------------------------------------------------------------------------------------------------------------------------------------------------------------------------------------------------|--|

|  |  |  |                                                                                                                                                                                                                                                                                                                                                                                                                                                                                                                                                                                                                                                                                                                                                                                                                                                                                                                                                                 |  |
|--|--|--|-----------------------------------------------------------------------------------------------------------------------------------------------------------------------------------------------------------------------------------------------------------------------------------------------------------------------------------------------------------------------------------------------------------------------------------------------------------------------------------------------------------------------------------------------------------------------------------------------------------------------------------------------------------------------------------------------------------------------------------------------------------------------------------------------------------------------------------------------------------------------------------------------------------------------------------------------------------------|--|
|  |  |  | <p>way food tastes, changes in skin, dizziness, hair loss, "I don't look like myself"</p> <p><u>Weight change cluster:</u><br/>increased appetite, weight gain</p> <p><u>GI cluster:</u> abdominal cramps, diarrhea</p> <p><b>T2</b><br/><u>Psychological cluster:</u> lack of energy, difficulty concentrating, feeling nervous, feeling sad, worrying, feeling irritable, problems with sexual interest or activity, difficulty sleeping</p> <p><u>CTX-related cluster:</u> dry mouth, nausea, lack of appetite, weight loss, change in the way food tastes, cough, abdominal cramps, diarrhea, feeling drowsy, sweats</p> <p><u>Weight change cluster:</u><br/>increased appetite, weight gain</p> <p><u>Epithelial cluster:</u> hair loss, changes in skin, itching, "I don't look like myself"</p> <p><b>T3</b><br/><u>Psychological cluster:</u> lack of energy, difficulty concentrating, feeling nervous, feeling sad, worrying, feeling irritable,</p> |  |
|--|--|--|-----------------------------------------------------------------------------------------------------------------------------------------------------------------------------------------------------------------------------------------------------------------------------------------------------------------------------------------------------------------------------------------------------------------------------------------------------------------------------------------------------------------------------------------------------------------------------------------------------------------------------------------------------------------------------------------------------------------------------------------------------------------------------------------------------------------------------------------------------------------------------------------------------------------------------------------------------------------|--|

|  |  |  |                                                                                                                                                                                                                                                                                                                                                                                                                                                                                                                                                                                                                                                                                                                                                                                                                                                                                                                                         |  |
|--|--|--|-----------------------------------------------------------------------------------------------------------------------------------------------------------------------------------------------------------------------------------------------------------------------------------------------------------------------------------------------------------------------------------------------------------------------------------------------------------------------------------------------------------------------------------------------------------------------------------------------------------------------------------------------------------------------------------------------------------------------------------------------------------------------------------------------------------------------------------------------------------------------------------------------------------------------------------------|--|
|  |  |  | <p>changes in skin, problems with sexual interest or activity, constipation</p> <p><u>CTX-related cluster</u>: dry mouth, nausea, lack of appetite, weight loss, change in the way food tastes, cough, abdominal cramps, diarrhea, feeling drowsy</p> <p><u>Weight change cluster</u>: increased appetite, weight gain, lack of appetite, weight loss</p> <p><u>Epithelial cluster</u>: changes in skin, itching, "I don't look like myself"</p> <p><u>Changes in symptom clusters over time</u>:</p> <p>Three symptom clusters (i.e., psychological, CTX-related, weight change) were identified across all three symptom dimensions and timepoints</p> <p>For the psychological symptom cluster, six symptoms of 14 remained stable across all three symptom dimensions and timepoints</p> <p>For the CTX-related symptom cluster, five of 18 symptoms remained stable across all symptom dimensions and timepoints. The symptoms</p> |  |
|--|--|--|-----------------------------------------------------------------------------------------------------------------------------------------------------------------------------------------------------------------------------------------------------------------------------------------------------------------------------------------------------------------------------------------------------------------------------------------------------------------------------------------------------------------------------------------------------------------------------------------------------------------------------------------------------------------------------------------------------------------------------------------------------------------------------------------------------------------------------------------------------------------------------------------------------------------------------------------|--|

|                                                                                                                                                                                                                                           |                                                                                                                                                              |                                                                                                                                                                                    |                                                                                                                                                                                                                                                                                                                                                                                                                                                                                                                                                                                                                                                                                                                  |                                                                                                                                                                         |
|-------------------------------------------------------------------------------------------------------------------------------------------------------------------------------------------------------------------------------------------|--------------------------------------------------------------------------------------------------------------------------------------------------------------|------------------------------------------------------------------------------------------------------------------------------------------------------------------------------------|------------------------------------------------------------------------------------------------------------------------------------------------------------------------------------------------------------------------------------------------------------------------------------------------------------------------------------------------------------------------------------------------------------------------------------------------------------------------------------------------------------------------------------------------------------------------------------------------------------------------------------------------------------------------------------------------------------------|-------------------------------------------------------------------------------------------------------------------------------------------------------------------------|
|                                                                                                                                                                                                                                           |                                                                                                                                                              |                                                                                                                                                                                    | <p>measured at T1 were relatively consistent across all three dimensions. At T2, the symptoms changed and remained relatively stable across each symptom dimension and through T3</p> <p>GI symptom cluster was identified across all three dimensions at T1 only. The symptoms within this cluster varied across each dimension</p> <p>Weight change cluster was present at each timepoint with two core symptoms present throughout</p> <p>Epithelial symptom cluster was identified across all three dimensions and the symptoms within this cluster remained relatively stable across each symptom dimension. However, this cluster was present at T2 and T3 only</p> <p><u>Additional outcomes:</u> N/A</p> |                                                                                                                                                                         |
| <p>Kim, S., 2018</p> <p><u>Purpose(s):</u><br/>Identify the changes and relationship between symptom clusters and the level of lipid peroxidation in patients with primary malignant brain cancer during concurrent chemoradiotherapy</p> | <p><i>n</i> = 51</p> <p>Mean age: 53.1 (±9.6) years<br/>Range: NR</p> <p>Female: 41.7%</p> <p>Ethnicity: NR</p> <p>Race: NR</p> <p>Employment status: NR</p> | <p><u>Instrument(s):</u> MSAS: 32 symptoms</p> <p><u>Analysis:</u> EFA</p> <p><u>Dimension(s):</u> severity</p> <p><u>Symptoms allowed to load on more than one factor:</u> No</p> | <p>2 symptom clusters identified at each timepoint:</p> <p><b>T1</b><br/><u>Negative emotion cluster:</u> feeling sad, worrying, lack of energy</p> <p><u>Neurocognitive cluster:</u> dizziness, difficulty in</p>                                                                                                                                                                                                                                                                                                                                                                                                                                                                                               | <p><u>Strengths:</u></p> <p>Evaluated for symptom clusters in patients with a type of brain cancer</p> <p>Evaluated for symptom clusters across multiple timepoints</p> |

|                                                                        |                                                                                                                                                                                                                                                                                                                                                                                             |                                                                                                                                                                                                                                                                                                |                                                                                                                                                                                                                                                                                                                                                                                                                                                                                                                                                                                                                                                                                                                                                                                                                                                                                                                                            |                                                                                                                                                                                                                                                                                                                                                                                                                                      |
|------------------------------------------------------------------------|---------------------------------------------------------------------------------------------------------------------------------------------------------------------------------------------------------------------------------------------------------------------------------------------------------------------------------------------------------------------------------------------|------------------------------------------------------------------------------------------------------------------------------------------------------------------------------------------------------------------------------------------------------------------------------------------------|--------------------------------------------------------------------------------------------------------------------------------------------------------------------------------------------------------------------------------------------------------------------------------------------------------------------------------------------------------------------------------------------------------------------------------------------------------------------------------------------------------------------------------------------------------------------------------------------------------------------------------------------------------------------------------------------------------------------------------------------------------------------------------------------------------------------------------------------------------------------------------------------------------------------------------------------|--------------------------------------------------------------------------------------------------------------------------------------------------------------------------------------------------------------------------------------------------------------------------------------------------------------------------------------------------------------------------------------------------------------------------------------|
| <p><u>Design</u>: longitudinal</p> <p><u>Location</u>: South Korea</p> | <p>Inpatients: NR<br/>Outpatients: NR</p> <p>Diagnosis:<br/>Anaplastic astrocytoma 37.5%<br/>Glioblastoma multiforme 62.5%</p> <p>Treatment:<br/>Chemoradiotherapy 100%</p> <p>Timepoints of symptom assessment:<br/>T1: prior to initiation of chemoradiotherapy<br/>T2: 2 to 3 weeks after initiation of chemoradiotherapy<br/>T3: 4 to 6 weeks after initiation of chemoradiotherapy</p> | <p><u>Minimum factor loadings required to include symptom within cluster</u>: NR</p> <p><u>Method of evaluating for stability of symptoms across symptom dimensions and/or timepoints</u>: Investigator appraisal</p> <p><u>Analysis of secondary outcomes</u>: serum lipid profile ratios</p> | <p>sleeping, difficulty in concentrating</p> <p><b>T2</b><br/><u>Negative emotion and decreased vitality cluster</u>: feeling sad, worrying, lack of energy, feeling irritable, difficulty in concentrating</p> <p><u>GI cluster</u>: dry mouth, change in the way food tastes, difficulty in swallowing, weight loss, nausea</p> <p><b>T3</b><br/><u>Body image and decreased vitality cluster</u>: lack of energy, difficulty in concentrating, "I don't look like myself", problems with sexual interest or activity, hair loss</p> <p><u>Decreased sensory cluster</u>: feeling irritable, swelling of arms or legs, problems with urination, numbness/tingling in the hands/feet</p> <p><u>Changes in symptom clusters over time</u>:</p> <p>The negative emotion symptom clusters were relatively stable from T1 to T2 with a basis of three core symptoms</p> <p>A GI symptom cluster emerged at T2 following the initiation of</p> | <p>Utilized a valid and reliable symptom assessment instrument</p> <p>Evaluated for a secondary outcome associated with symptom clusters</p> <p><u>Limitations</u>:</p> <p>Recruited patients from a single hospital</p> <p>Very small sample size</p> <p>Used a single dimension to evaluate for symptom clusters</p> <p>Not clear how the relationships between symptom clusters and serum lipid profile ratios were evaluated</p> |
|------------------------------------------------------------------------|---------------------------------------------------------------------------------------------------------------------------------------------------------------------------------------------------------------------------------------------------------------------------------------------------------------------------------------------------------------------------------------------|------------------------------------------------------------------------------------------------------------------------------------------------------------------------------------------------------------------------------------------------------------------------------------------------|--------------------------------------------------------------------------------------------------------------------------------------------------------------------------------------------------------------------------------------------------------------------------------------------------------------------------------------------------------------------------------------------------------------------------------------------------------------------------------------------------------------------------------------------------------------------------------------------------------------------------------------------------------------------------------------------------------------------------------------------------------------------------------------------------------------------------------------------------------------------------------------------------------------------------------------------|--------------------------------------------------------------------------------------------------------------------------------------------------------------------------------------------------------------------------------------------------------------------------------------------------------------------------------------------------------------------------------------------------------------------------------------|

|                                                                                                                                                                                                                                                                                       |                                                                                                                                                                                                                                                                                                                                                                                                                                                                                                                                                                                                              |                                                                                                                                                                                                                                                                                                                                                                                                                                                                                                                                                                                                                                                                                                     |                                                                                                                                                                                                                                                                                                                                                                                                                                                                                                                                                                                                                                 |                                                                                                                                                                                                                                                                                            |
|---------------------------------------------------------------------------------------------------------------------------------------------------------------------------------------------------------------------------------------------------------------------------------------|--------------------------------------------------------------------------------------------------------------------------------------------------------------------------------------------------------------------------------------------------------------------------------------------------------------------------------------------------------------------------------------------------------------------------------------------------------------------------------------------------------------------------------------------------------------------------------------------------------------|-----------------------------------------------------------------------------------------------------------------------------------------------------------------------------------------------------------------------------------------------------------------------------------------------------------------------------------------------------------------------------------------------------------------------------------------------------------------------------------------------------------------------------------------------------------------------------------------------------------------------------------------------------------------------------------------------------|---------------------------------------------------------------------------------------------------------------------------------------------------------------------------------------------------------------------------------------------------------------------------------------------------------------------------------------------------------------------------------------------------------------------------------------------------------------------------------------------------------------------------------------------------------------------------------------------------------------------------------|--------------------------------------------------------------------------------------------------------------------------------------------------------------------------------------------------------------------------------------------------------------------------------------------|
|                                                                                                                                                                                                                                                                                       |                                                                                                                                                                                                                                                                                                                                                                                                                                                                                                                                                                                                              |                                                                                                                                                                                                                                                                                                                                                                                                                                                                                                                                                                                                                                                                                                     | <p>chemoradiation therapy and disappeared at T3</p> <p>A decreased sensory cluster emerged at T3</p> <p><u>Additional outcomes:</u><br/>Three lipid profile ratios (i.e., TC/HDL-c, LDL-c/HDL-c, TG/HDL-c) were positively associated with the two symptom clusters at T2</p>                                                                                                                                                                                                                                                                                                                                                   |                                                                                                                                                                                                                                                                                            |
| <p>Li et al., 2020</p> <p><u>Purpose(s):</u><br/>Identify symptom clusters experienced by women with breast cancer treated with AI therapy from pre-adjuvant therapy up to 18 months of adjuvant therapy</p> <p><u>Design:</u> longitudinal</p> <p><u>Location:</u> United States</p> | <p><i>n</i> = 354</p> <p>Mean age: 61.2 (±6.2) years<br/>Range: NR</p> <p>Female: 100.0%</p> <p>Ethnicity: NR</p> <p>Race:<br/>White 96.3%<br/>African American 3.7%</p> <p>Employment status:<br/>Working 70.7%<br/>Not working 29.3%</p> <p>Inpatients: NR<br/>Outpatients: NR</p> <p>Diagnosis:<br/>Breast cancer 100.0%</p> <p>Treatment:<br/>Adjuvant CTX with AI 35.9%<br/>AI only 64.1%</p> <p>Timepoints of symptom assessment:<br/>T0: pre-adjuvant therapy (baseline)<br/>T1: six months into adjuvant therapy<br/>T2: 12 months into adjuvant therapy<br/>T3: 18 months into adjuvant therapy</p> | <p><u>Instrument(s):</u> Breast Cancer Prevention Trial Symptom Checklist: 42 symptoms<br/>Profile of Mood States: 2 symptoms (i.e., fatigue, anxiety)<br/>Beck Depression Inventory II: 2 symptoms (i.e., depression, changes in sleep pattern)<br/>Patient's Assessment of Own Functioning: 1 symptom (i.e., perceived cognitive ability)</p> <p><u>Criteria used to exclude symptoms:</u> Yes</p> <p><u>Analysis:</u> EFA</p> <p><u>Dimension(s):</u> severity</p> <p><u>Symptoms allowed to load on more than one factor:</u> No</p> <p><u>Minimum factor loadings required to include symptom within cluster:</u> 0.40</p> <p><u>Method of evaluating for stability of symptoms across</u></p> | <p>8 symptom clusters identified across the timepoints:</p> <p><b>T0</b><br/><u>Psychological cluster:</u> depression, anxiety, changes in sleep patterns, avoid of social affairs, fatigue</p> <p><u>Neurocognitive cluster:</u> difficulty concentrating, easily distracted, forgetfulness, perceived cognitive disturbance</p> <p><u>Musculoskeletal cluster:</u> joint pain, general aches and pain, muscle stiffness</p> <p><u>Vasomotor cluster:</u> night sweats, hot flashes</p> <p><u>Urinary cluster:</u> difficulty with bladder control when laughing or crying, difficulty with bladder control at other times</p> | <p><u>Strengths:</u></p> <p>Evaluated for symptom clusters across multiple timepoints</p> <p>Utilized valid and reliable symptom assessment instruments</p> <p><u>Limitations:</u></p> <p>Primarily a Caucasian sample</p> <p>Used a single dimension to evaluate for symptom clusters</p> |

|  |  |                                                                                                                               |                                                                                                                                                                                                                                                                                                                                                                                                                                                                                                                                                                                                                                                                                                                                                                                                                                                                                                              |  |
|--|--|-------------------------------------------------------------------------------------------------------------------------------|--------------------------------------------------------------------------------------------------------------------------------------------------------------------------------------------------------------------------------------------------------------------------------------------------------------------------------------------------------------------------------------------------------------------------------------------------------------------------------------------------------------------------------------------------------------------------------------------------------------------------------------------------------------------------------------------------------------------------------------------------------------------------------------------------------------------------------------------------------------------------------------------------------------|--|
|  |  | <p><u>symptom dimensions and/or timepoints</u>: Kirkova and Walsh, 2007</p> <p><u>Analysis of secondary outcomes</u>: N/A</p> | <p><u>Sexual cluster</u>: vaginal dryness, pain with intercourse</p> <p><u>Weight cluster</u>: decreased appetite, weight loss</p> <p><b>T1</b></p> <p><u>Psychological cluster</u>: anxiety, depression, fatigue, avoid of social affairs</p> <p><u>Neurocognitive cluster</u>: difficulty concentrating, forgetfulness, easily distracted, perceived cognitive disturbance, dry mouth</p> <p><u>Musculoskeletal cluster</u>: general aches and pain, joint pain, muscle stiffness</p> <p><u>Vasomotor cluster</u>: night sweats, hot flashes</p> <p><u>Urinary cluster</u>: difficulty with bladder control at other times, difficulty with bladder control when laughing or crying</p> <p><u>Sexual cluster</u>: vaginal dryness, pain with intercourse</p> <p><u>Weight cluster</u>: unhappy with the appearance of my body, weight gain</p> <p><u>GI cluster</u>: diarrhea, nausea</p> <p><b>T2</b></p> |  |
|--|--|-------------------------------------------------------------------------------------------------------------------------------|--------------------------------------------------------------------------------------------------------------------------------------------------------------------------------------------------------------------------------------------------------------------------------------------------------------------------------------------------------------------------------------------------------------------------------------------------------------------------------------------------------------------------------------------------------------------------------------------------------------------------------------------------------------------------------------------------------------------------------------------------------------------------------------------------------------------------------------------------------------------------------------------------------------|--|

|  |  |  |                                                                                                                                                                                                                                                                                                                                                                                                                                                                                                                                                                                                                                                                                                                                                                                                                                                                                                                                                                                                                                                          |  |
|--|--|--|----------------------------------------------------------------------------------------------------------------------------------------------------------------------------------------------------------------------------------------------------------------------------------------------------------------------------------------------------------------------------------------------------------------------------------------------------------------------------------------------------------------------------------------------------------------------------------------------------------------------------------------------------------------------------------------------------------------------------------------------------------------------------------------------------------------------------------------------------------------------------------------------------------------------------------------------------------------------------------------------------------------------------------------------------------|--|
|  |  |  | <p><u>Psychological cluster:</u><br/>fatigue, depression,<br/>changes in sleep patterns</p> <p><u>Neurocognitive cluster:</u><br/>easily distracted, difficulty<br/>concentrating, perceived<br/>cognitive disturbance,<br/>forgetfulness, excitability,<br/>tendency toward<br/>accidents, short temper,<br/>anxiety</p> <p><u>Musculoskeletal cluster:</u><br/>joint pain, general aches<br/>and pain, muscle stiffness</p> <p><u>Vasomotor cluster:</u> night<br/>sweats, hot flashes</p> <p><u>Urinary cluster:</u> difficulty<br/>with bladder control at<br/>other times, difficulty with<br/>bladder control when<br/>laughing or crying</p> <p><u>Sexual cluster:</u> vaginal<br/>dryness, pain with<br/>intercourse</p> <p><u>Weight cluster:</u> weight<br/>gain, unhappy with the<br/>appearance of my body</p> <p><b>T3</b><br/><u>Psychoneurocognitive<br/>cluster:</u> perceived<br/>cognitive disturbance,<br/>excitability, forgetfulness,<br/>anxiety, difficulty<br/>concentrating, easily<br/>distracted, depression,<br/>fatigue</p> |  |
|--|--|--|----------------------------------------------------------------------------------------------------------------------------------------------------------------------------------------------------------------------------------------------------------------------------------------------------------------------------------------------------------------------------------------------------------------------------------------------------------------------------------------------------------------------------------------------------------------------------------------------------------------------------------------------------------------------------------------------------------------------------------------------------------------------------------------------------------------------------------------------------------------------------------------------------------------------------------------------------------------------------------------------------------------------------------------------------------|--|



|  |  |  |                                                                                                                                                                                                                                                                                                                                                                                                                                                                                                                                                                                                                                                                                                                                                                                                                                                                                                      |  |
|--|--|--|------------------------------------------------------------------------------------------------------------------------------------------------------------------------------------------------------------------------------------------------------------------------------------------------------------------------------------------------------------------------------------------------------------------------------------------------------------------------------------------------------------------------------------------------------------------------------------------------------------------------------------------------------------------------------------------------------------------------------------------------------------------------------------------------------------------------------------------------------------------------------------------------------|--|
|  |  |  | <p><u>Musculoskeletal cluster:</u><br/>joint pain, muscle stiffness, general aches and pain</p> <p><u>Vasomotor cluster:</u> night sweats, hot flashes</p> <p><u>Urinary cluster:</u> difficulty with bladder control when laughing or crying, difficulty with bladder control at other times</p> <p><u>Sexual cluster:</u> vaginal dryness, pain with intercourse</p> <p><u>Weight cluster:</u> weight gain, unhappy with the appearance of my body</p> <p><u>Changes in symptom clusters over time:</u></p> <p>The psychological and neurocognitive symptom clusters were present at T0, T1, and T2, and the symptoms within the clusters remained relatively stable across timepoints. However, these clusters merged at T3</p> <p>Weight symptom cluster was present at all four timepoints. However, the symptoms within the cluster changed from T0 to T1. Symptoms from T1-T3 were stable</p> |  |
|--|--|--|------------------------------------------------------------------------------------------------------------------------------------------------------------------------------------------------------------------------------------------------------------------------------------------------------------------------------------------------------------------------------------------------------------------------------------------------------------------------------------------------------------------------------------------------------------------------------------------------------------------------------------------------------------------------------------------------------------------------------------------------------------------------------------------------------------------------------------------------------------------------------------------------------|--|

|                                                                                                                                                                                                                                                                                                                                                                                                                                 |                                                                                                                                                                                                                                                                                                                                                                                                                                                                                                                           |                                                                                                                                                                                                                                                                                                                                                                                                                                                                                                                                                           |                                                                                                                                                                                                                                                                                                                                                                                                                                                                                                                                                                                                                                                                            |                                                                                                                                                                                                                                                                                                                                                                                                                                                                                                                                  |
|---------------------------------------------------------------------------------------------------------------------------------------------------------------------------------------------------------------------------------------------------------------------------------------------------------------------------------------------------------------------------------------------------------------------------------|---------------------------------------------------------------------------------------------------------------------------------------------------------------------------------------------------------------------------------------------------------------------------------------------------------------------------------------------------------------------------------------------------------------------------------------------------------------------------------------------------------------------------|-----------------------------------------------------------------------------------------------------------------------------------------------------------------------------------------------------------------------------------------------------------------------------------------------------------------------------------------------------------------------------------------------------------------------------------------------------------------------------------------------------------------------------------------------------------|----------------------------------------------------------------------------------------------------------------------------------------------------------------------------------------------------------------------------------------------------------------------------------------------------------------------------------------------------------------------------------------------------------------------------------------------------------------------------------------------------------------------------------------------------------------------------------------------------------------------------------------------------------------------------|----------------------------------------------------------------------------------------------------------------------------------------------------------------------------------------------------------------------------------------------------------------------------------------------------------------------------------------------------------------------------------------------------------------------------------------------------------------------------------------------------------------------------------|
|                                                                                                                                                                                                                                                                                                                                                                                                                                 |                                                                                                                                                                                                                                                                                                                                                                                                                                                                                                                           |                                                                                                                                                                                                                                                                                                                                                                                                                                                                                                                                                           | <p>GI symptom cluster was only present at T1</p> <p>The musculoskeletal, vasomotor, urinary, and sexual symptom clusters remained stable across time with a basis of core symptoms</p> <p>Additional outcomes: N/A</p>                                                                                                                                                                                                                                                                                                                                                                                                                                                     |                                                                                                                                                                                                                                                                                                                                                                                                                                                                                                                                  |
| <p>Lin et al., 2019</p> <p><u>Purpose(s)</u>: Identify symptom clusters using the ratings of occurrence, severity, and distress in newly diagnosed patients with AML at three stages of their induction therapy</p> <p>Evaluated for consensus among the numbers and types of symptoms in each symptom cluster identified by multiple dimensions over time</p> <p><u>Design</u>: longitudinal</p> <p><u>Location</u>: China</p> | <p><math>n = 126</math></p> <p>Mean age: 35.4 (<math>\pm 11.6</math>) years<br/>Range: NR</p> <p>Female: 56.3%</p> <p>Ethnicity: NR</p> <p>Race: NR</p> <p>Employment status: NR</p> <p>Inpatients: <math>n = 126</math><br/>Outpatients: <math>n = 0</math></p> <p>Diagnosis:<br/>AML 100.0%</p> <p>Treatment:<br/>Induction CTX 100.0%</p> <p>Timepoints of symptom assessment:<br/>T1: within the six days prior to induction CTX<br/>T2: 1 to 7 days during induction CTX<br/>T3: 1 to 7 days after induction CTX</p> | <p><u>Instrument(s)</u>: MSAS-Chinese version: 32 symptoms</p> <p><u>Criteria used to exclude symptoms</u>: Yes</p> <p><u>Analysis</u>: EFA</p> <p><u>Dimension(s)</u>: occurrence, severity, distress</p> <p><u>Symptoms allowed to load on more than one factor</u>: Yes</p> <p><u>Minimum factor loadings required to include symptom within cluster</u>: 0.40</p> <p><u>Method of evaluating for stability of symptoms across symptom dimensions and/or timepoints</u>: Kirkova and Walsh, 2007</p> <p><u>Analysis of secondary outcomes</u>: N/A</p> | <p>6 symptom clusters identified across the symptom dimensions and timepoints:</p> <p><i>Occurrence symptom clusters</i><br/><b>T1</b><br/><u>Nutritional cluster</u>: cough, dry mouth, sweats, lack of appetite, change in the way food tastes</p> <p><u>Sickness behavior cluster</u>: difficulty sleeping, shortness of breath, feeling sad, dizziness, changes in skin</p> <p><u>Neuropathy cluster</u>: difficulty concentrating, feeling drowsy</p> <p><b>T2</b><br/><u>GI cluster</u>: difficulty concentrating, nausea, vomiting</p> <p><u>Psychological cluster</u>: feeling nervous, difficulty sleeping, shortness of breath, feeling sad</p> <p><b>T3</b></p> | <p><u>Strengths</u>:</p> <p>Evaluated for symptom clusters across multiple timepoints</p> <p>Symptom clusters were created using multiple dimensions of the symptom experience</p> <p>Evaluated symptom clusters in patients with AML</p> <p>Utilized a valid and reliable symptom inventory</p> <p><u>Limitations</u>:</p> <p>Recruited patients from a single hospital</p> <p>Names of symptom clusters are not consistent with symptoms within the cluster (e.g., neuropathy cluster)</p> <p>Relatively small sample size</p> |

|  |  |  |                                                                                                                                                                                                                                                                                                                                                                                                                                                                                                                                                                                                                                                                                                                                                                                                                                                                                                                  |  |
|--|--|--|------------------------------------------------------------------------------------------------------------------------------------------------------------------------------------------------------------------------------------------------------------------------------------------------------------------------------------------------------------------------------------------------------------------------------------------------------------------------------------------------------------------------------------------------------------------------------------------------------------------------------------------------------------------------------------------------------------------------------------------------------------------------------------------------------------------------------------------------------------------------------------------------------------------|--|
|  |  |  | <p><u>Nutritional cluster</u>: dry mouth, mouth sores, constipation</p> <p><u>GI cluster</u>: difficulty concentrating, nausea, vomiting, feeling drowsy, "I don't like myself"</p> <p><u>Psychological cluster</u>: feeling nervous, feeling sad</p> <p><u>Body image cluster</u>: itching, changes in skin</p> <p><i>Severity symptom clusters</i><br/><b>T1</b></p> <p><u>Nutritional cluster</u>: cough, dry mouth, sweats</p> <p><u>Sickness behavior cluster</u>: difficulty sleeping, shortness of breath, feeling sad</p> <p><u>Neuropathy cluster</u>: difficulty concentrating, feeling drowsy</p> <p><u>Body image cluster</u>: itching, mouth sores</p> <p><b>T2</b></p> <p><u>Sickness behavior cluster</u>: difficulty concentrating, change in the way food tastes, "I don't look myself"</p> <p><u>GI cluster</u>: difficulty concentrating, nausea, vomiting, change in the way food tastes</p> |  |
|--|--|--|------------------------------------------------------------------------------------------------------------------------------------------------------------------------------------------------------------------------------------------------------------------------------------------------------------------------------------------------------------------------------------------------------------------------------------------------------------------------------------------------------------------------------------------------------------------------------------------------------------------------------------------------------------------------------------------------------------------------------------------------------------------------------------------------------------------------------------------------------------------------------------------------------------------|--|

|  |  |  |                                                                                                                                                                                                                                                                                                                                                                                                                                                                                                                                                                                                                                                                                                                                                                                                                                                                                                                                                                                                                          |  |
|--|--|--|--------------------------------------------------------------------------------------------------------------------------------------------------------------------------------------------------------------------------------------------------------------------------------------------------------------------------------------------------------------------------------------------------------------------------------------------------------------------------------------------------------------------------------------------------------------------------------------------------------------------------------------------------------------------------------------------------------------------------------------------------------------------------------------------------------------------------------------------------------------------------------------------------------------------------------------------------------------------------------------------------------------------------|--|
|  |  |  | <p><u>Psychological cluster:</u><br/>feeling nervous, difficulty sleeping, feeling sad</p> <p><b>T3</b></p> <p><u>Nutritional cluster:</u> dry mouth, change in the way food tastes, mouth sores, weight loss, constipation, "I don't like myself"</p> <p><u>GI cluster:</u> difficulty concentrating, nausea, vomiting, feeling drowsy</p> <p><u>Psychological cluster:</u><br/>feeling nervous, difficulty sleeping, feeling sad, feeling irritable</p> <p><u>Body image cluster:</u><br/>itching, changes in skin</p> <p><i>Distress symptom clusters</i></p> <p><b>T1</b></p> <p><u>Nutritional cluster:</u> cough, dry mouth, sweats</p> <p><u>Sickness behavior cluster:</u><br/>shortness of breath, feeling sad, changes in skin</p> <p><u>Neuropathy cluster:</u><br/>difficulty concentrating, feeling drowsy, feeling irritable</p> <p><u>Body image cluster:</u><br/>itching, mouth sores</p> <p><b>T2</b></p> <p><u>Sickness behavior cluster:</u><br/>difficulty concentrating, change in the way food</p> |  |
|--|--|--|--------------------------------------------------------------------------------------------------------------------------------------------------------------------------------------------------------------------------------------------------------------------------------------------------------------------------------------------------------------------------------------------------------------------------------------------------------------------------------------------------------------------------------------------------------------------------------------------------------------------------------------------------------------------------------------------------------------------------------------------------------------------------------------------------------------------------------------------------------------------------------------------------------------------------------------------------------------------------------------------------------------------------|--|

|  |  |  |                                                                                                                                                                                                                                                                                                                                                                                                                                                                                                                                                                                                                                                                                                                                                                                                                                                                       |  |
|--|--|--|-----------------------------------------------------------------------------------------------------------------------------------------------------------------------------------------------------------------------------------------------------------------------------------------------------------------------------------------------------------------------------------------------------------------------------------------------------------------------------------------------------------------------------------------------------------------------------------------------------------------------------------------------------------------------------------------------------------------------------------------------------------------------------------------------------------------------------------------------------------------------|--|
|  |  |  | <p>tastes, "I don't look myself"</p> <p><u>GI cluster</u>: difficulty concentrating, nausea, vomiting, change in the way food tastes</p> <p><u>Psychological cluster</u>: feeling nervous, feeling sad</p> <p><b>T3</b></p> <p><u>Nutritional cluster</u>: dry mouth, change in the way food tastes, difficulty concentrating, constipation, "I don't like myself"</p> <p><u>GI cluster</u>: difficulty concentrating, nausea, vomiting, sweats</p> <p><u>Psychological cluster</u>: feeling nervous, feeling sad</p> <p><u>Body image cluster</u>: itching, changes in skin</p> <p><u>Changes in symptom clusters over time</u>:</p> <p>The number and agreement of symptoms within each symptom cluster varied across dimensions and over time</p> <p>GI symptom cluster emerged at T2 and remained present at T3. Three core symptoms were present across each</p> |  |
|--|--|--|-----------------------------------------------------------------------------------------------------------------------------------------------------------------------------------------------------------------------------------------------------------------------------------------------------------------------------------------------------------------------------------------------------------------------------------------------------------------------------------------------------------------------------------------------------------------------------------------------------------------------------------------------------------------------------------------------------------------------------------------------------------------------------------------------------------------------------------------------------------------------|--|

|                                                                                                                                                                                                                                                                                                                                               |                                                                                                                                                                                                                                                                                                                                                                                                                                                                                                                                                                                     |                                                                                                                                                                                                                                                                                                                                                                                                                                                                                                                                            |                                                                                                                                                                                                                                                                                                                                                                                                                                                                                                                                                                                                                                                  |                                                                                                                                                                                                                                                                                                                                      |
|-----------------------------------------------------------------------------------------------------------------------------------------------------------------------------------------------------------------------------------------------------------------------------------------------------------------------------------------------|-------------------------------------------------------------------------------------------------------------------------------------------------------------------------------------------------------------------------------------------------------------------------------------------------------------------------------------------------------------------------------------------------------------------------------------------------------------------------------------------------------------------------------------------------------------------------------------|--------------------------------------------------------------------------------------------------------------------------------------------------------------------------------------------------------------------------------------------------------------------------------------------------------------------------------------------------------------------------------------------------------------------------------------------------------------------------------------------------------------------------------------------|--------------------------------------------------------------------------------------------------------------------------------------------------------------------------------------------------------------------------------------------------------------------------------------------------------------------------------------------------------------------------------------------------------------------------------------------------------------------------------------------------------------------------------------------------------------------------------------------------------------------------------------------------|--------------------------------------------------------------------------------------------------------------------------------------------------------------------------------------------------------------------------------------------------------------------------------------------------------------------------------------|
|                                                                                                                                                                                                                                                                                                                                               |                                                                                                                                                                                                                                                                                                                                                                                                                                                                                                                                                                                     |                                                                                                                                                                                                                                                                                                                                                                                                                                                                                                                                            | <p>dimension and both time points (i.e., difficulty concentrating, nausea, vomiting)</p> <p>Psychological symptom cluster emerged at T2 and persisted into T3. However, only two core symptoms remained consistent across each timepoint and dimension (i.e., feeling nervous, feeling sad)</p> <p><u>Additional outcomes:</u> N/A</p>                                                                                                                                                                                                                                                                                                           |                                                                                                                                                                                                                                                                                                                                      |
| <p>Russell et al., 2019</p> <p><u>Purpose(s):</u><br/>Evaluate for differences in the number and types of symptom clusters at three time points using ratings of symptom occurrence and severity</p> <p>Evaluate for changes in these symptom clusters over time</p> <p><u>Design:</u> longitudinal</p> <p><u>Location:</u> United States</p> | <p><i>n</i> = 145</p> <p>Mean age: 64.0 (<math>\pm</math>11.1) years<br/>Range: NR</p> <p>Female: 56.6%</p> <p>Ethnicity and Race:<br/>White 71.8%<br/>Black 9.9%<br/>Asian or Pacific Islander 9.9%<br/>Hispanic, Mixed, or Other 8.5%</p> <p>Employment status:<br/>Working 24.8%<br/>Not working 75.2%</p> <p>Inpatients: <i>n</i> = 0<br/>Outpatients: <i>n</i> = 145</p> <p>Diagnosis:<br/>Non-small cell lung cancer 88.1%<br/>Small cell lung cancer 11.9%</p> <p>Treatment:<br/>Platinum-doublet CTX 77.9%<br/>Single agent CTX 20.0%<br/>Monoclonal antibody only 2.1%</p> | <p><u>Instrument(s):</u> MSAS (modified): 38 symptoms</p> <p><u>Criteria used to exclude symptoms:</u> Yes</p> <p><u>Analysis:</u> EFA</p> <p><u>Dimension(s):</u> occurrence, severity</p> <p><u>Symptoms allowed to load on more than one factor:</u> Yes</p> <p><u>Minimum factor loadings required to include symptom within cluster:</u> 0.40</p> <p><u>Method of evaluating for stability of symptoms across symptom dimensions and/or timepoints:</u> Kirkova and Walsh, 2007</p> <p><u>Analysis of secondary outcomes:</u> N/A</p> | <p>6 symptom clusters identified across the symptom dimensions and timepoints:</p> <p><i>Occurrence symptom clusters</i><br/><b>T1</b><br/><u>Sickness behavior cluster:</u> feeling drowsy, lack of energy, problems with sexual interest, hair loss, dizziness, pain</p> <p><u>Lung cancer-specific cluster:</u> cough, difficulty breathing, shortness of breath, dry mouth, swelling of arms or legs</p> <p><u>Psychological cluster:</u> difficulty concentrating, difficulty breathing, feeling bloated, feeling irritable, feeling nervous, feeling sad, worrying, weight loss</p> <p><u>Epithelial/GI cluster:</u> abdominal cramps,</p> | <p><u>Strengths:</u></p> <p>Evaluated for symptom clusters across multiple timepoints</p> <p>Symptom clusters were created using multiple dimensions of the symptom experience</p> <p>Evaluated symptom clusters in patients with lung cancers</p> <p>Utilized a valid and reliable symptom inventory</p> <p><u>Limitations:</u></p> |

|  |                                                                                                                                                                          |  |                                                                                                                                                                                                                                                                                                                                                                                                                                                                                                                                                                                                                                                                                                                                                                                                                                                                                                                                                                                                                                     |  |
|--|--------------------------------------------------------------------------------------------------------------------------------------------------------------------------|--|-------------------------------------------------------------------------------------------------------------------------------------------------------------------------------------------------------------------------------------------------------------------------------------------------------------------------------------------------------------------------------------------------------------------------------------------------------------------------------------------------------------------------------------------------------------------------------------------------------------------------------------------------------------------------------------------------------------------------------------------------------------------------------------------------------------------------------------------------------------------------------------------------------------------------------------------------------------------------------------------------------------------------------------|--|
|  | <p>Timepoints of symptom assessment:<br/> T1: prior to second or third cycle of CTX<br/> T2: approximately 1 week after CTX<br/> T3: approximately 2 weeks after CTX</p> |  | <p>constipation, nausea, sweats, lack of appetite, weight loss, changes in skin, I don't look like myself, change in the way food tastes</p> <p><u>Nutritional cluster:</u><br/> increased appetite, lack of appetite, weight gain</p> <p><b>T2</b><br/> <u>Sickness behavior cluster:</u><br/> abdominal cramps, constipation, difficulty concentrating, feeling drowsy, lack of energy, nausea, sweats, vomiting</p> <p><u>Lung cancer-specific cluster:</u> chest tightness, cough, difficulty breathing, shortness of breath</p> <p><u>Psychological cluster:</u><br/> difficulty concentrating, feeling bloated, feeling irritable, feeling nervous, feeling sad, problems with sexual interest or activity, worrying</p> <p><u>Nutritional cluster:</u><br/> increased appetite, lack of appetite, weight gain, weight loss</p> <p><u>Epithelial cluster:</u> changes in skin, hair loss, "I do not look like myself", mouth sores</p> <p><b>T3</b><br/> <u>Sickness behavior cluster:</u><br/> difficulty concentrating,</p> |  |
|--|--------------------------------------------------------------------------------------------------------------------------------------------------------------------------|--|-------------------------------------------------------------------------------------------------------------------------------------------------------------------------------------------------------------------------------------------------------------------------------------------------------------------------------------------------------------------------------------------------------------------------------------------------------------------------------------------------------------------------------------------------------------------------------------------------------------------------------------------------------------------------------------------------------------------------------------------------------------------------------------------------------------------------------------------------------------------------------------------------------------------------------------------------------------------------------------------------------------------------------------|--|

|  |  |  |                                                                                                                                                                                                                                                                                                                                                                                                                                                                                                                                                                                                                                                                                                                                                                                                                                                                                                                                                                                                                                                     |  |
|--|--|--|-----------------------------------------------------------------------------------------------------------------------------------------------------------------------------------------------------------------------------------------------------------------------------------------------------------------------------------------------------------------------------------------------------------------------------------------------------------------------------------------------------------------------------------------------------------------------------------------------------------------------------------------------------------------------------------------------------------------------------------------------------------------------------------------------------------------------------------------------------------------------------------------------------------------------------------------------------------------------------------------------------------------------------------------------------|--|
|  |  |  | <p>feeling drowsy, lack of energy, cough</p> <p><u>Lung cancer-specific cluster:</u> chest tightness, cough, difficulty breathing, shortness of breath, weight loss, dizziness, pain</p> <p><u>Epithelial/GI cluster:</u> abdominal cramps, feeling drowsy, sweats, feeling bloated, problems with sexual interest or activity, lack of appetite, weight gain, changes in skin, hair loss, "I do not look like myself", mouth sores, dizziness, change in the way food tastes</p> <p><u>Psychological cluster:</u> nausea, vomiting, feeling irritable, feeling nervous, feeling sad, worrying</p> <p><u>Nutritional cluster:</u> increased appetite, lack of appetite, weight gain</p> <p><i>Severity symptom clusters</i><br/><b>T1</b></p> <p><u>Lung cancer-specific cluster:</u> feeling drowsy, lack of energy, chest tightness, cough, difficulty breathing, shortness of breath, dizziness, pain</p> <p><u>Epithelial/GI cluster:</u> constipation, nausea, sweats, lack of appetite, weight loss, changes in skin, "I do not look like</p> |  |
|--|--|--|-----------------------------------------------------------------------------------------------------------------------------------------------------------------------------------------------------------------------------------------------------------------------------------------------------------------------------------------------------------------------------------------------------------------------------------------------------------------------------------------------------------------------------------------------------------------------------------------------------------------------------------------------------------------------------------------------------------------------------------------------------------------------------------------------------------------------------------------------------------------------------------------------------------------------------------------------------------------------------------------------------------------------------------------------------|--|



|  |  |  |                                                                                                                                                                                                                                                                                                                                                                                                                                                                                                                                                                                                                                                                                                                                                                                                                                                                                                                                                                               |  |
|--|--|--|-------------------------------------------------------------------------------------------------------------------------------------------------------------------------------------------------------------------------------------------------------------------------------------------------------------------------------------------------------------------------------------------------------------------------------------------------------------------------------------------------------------------------------------------------------------------------------------------------------------------------------------------------------------------------------------------------------------------------------------------------------------------------------------------------------------------------------------------------------------------------------------------------------------------------------------------------------------------------------|--|
|  |  |  | <p>myself", change in the way food tastes</p> <p><u>Psychological cluster:</u><br/>feeling bloated, feeling irritable, feeling nervous, feeling sad, worrying, weight loss, difficulty sleeping</p> <p><u>Nutritional cluster:</u> sweats, increased appetite, lack of appetite, weight gain</p> <p><b>T2</b></p> <p><u>Sickness behavior cluster:</u><br/>abdominal cramps, constipation, difficulty concentrating, feeling drowsy, lack of energy, nausea, sweats, vomiting, feeling bloated, feeling nervous, feeling sad, problems with sexual interest or activity, worrying, dizziness, dry mouth, pain, swelling of arms or legs</p> <p><u>Lung cancer-specific cluster:</u> chest tightness, cough, difficulty breathing, dry mouth, shortness of breath</p> <p><u>Nutritional cluster:</u><br/>increased appetite, lack of appetite, weight gain, weight loss</p> <p><u>Psychological cluster:</u><br/>feeling irritable, feeling nervous, feeling sad, worrying</p> |  |
|--|--|--|-------------------------------------------------------------------------------------------------------------------------------------------------------------------------------------------------------------------------------------------------------------------------------------------------------------------------------------------------------------------------------------------------------------------------------------------------------------------------------------------------------------------------------------------------------------------------------------------------------------------------------------------------------------------------------------------------------------------------------------------------------------------------------------------------------------------------------------------------------------------------------------------------------------------------------------------------------------------------------|--|

|  |  |  |                                                                                                                                                                                                                                                                                                                                                                                                                                                                                                                                                                                                                                                                                                                                                                                                                                                                                                                                                                                             |  |
|--|--|--|---------------------------------------------------------------------------------------------------------------------------------------------------------------------------------------------------------------------------------------------------------------------------------------------------------------------------------------------------------------------------------------------------------------------------------------------------------------------------------------------------------------------------------------------------------------------------------------------------------------------------------------------------------------------------------------------------------------------------------------------------------------------------------------------------------------------------------------------------------------------------------------------------------------------------------------------------------------------------------------------|--|
|  |  |  | <p><u>Epithelial cluster</u>: changes in skin, "I do not look like myself", mouth sores, swelling of arms or legs</p> <p><b>T3</b></p> <p><u>Sickness behavior cluster</u>: difficulty concentrating, chest tightness, feeling irritable, feeling nervous, dizziness</p> <p><u>Lung cancer-specific cluster</u>: difficulty concentrating, feeling drowsy, lack of energy, chest tightness, cough, difficulty breathing, shortness of breath, dry mouth, pain</p> <p><u>Epithelial/GI cluster</u>: abdominal cramps, constipation, sweats, feeling bloated, problems with sexual interest or activity, lack of appetite, weight loss, changes in skin, hair loss, "I do not look like myself", mouth sores, dizziness, change in the way food tastes</p> <p><u>Psychological cluster</u>: nausea, vomiting, feeling nervous, feeling sad, worrying</p> <p><u>Nutritional cluster</u>: increased appetite, weight gain, weight loss</p> <p><u>Changes in symptom clusters over time</u>:</p> |  |
|--|--|--|---------------------------------------------------------------------------------------------------------------------------------------------------------------------------------------------------------------------------------------------------------------------------------------------------------------------------------------------------------------------------------------------------------------------------------------------------------------------------------------------------------------------------------------------------------------------------------------------------------------------------------------------------------------------------------------------------------------------------------------------------------------------------------------------------------------------------------------------------------------------------------------------------------------------------------------------------------------------------------------------|--|

|                                                                                                                                                                                                                                                                                                                                                            |                                                                                                                                                                                                                                                                                                                                                                                                                                               |                                                                                                                                                                                                                                                                                                                                                                                                                                                      |                                                                                                                                                                                                                                                                                                                                                                                                                                                                                |                                                                                                                                                                                                                                                                                               |
|------------------------------------------------------------------------------------------------------------------------------------------------------------------------------------------------------------------------------------------------------------------------------------------------------------------------------------------------------------|-----------------------------------------------------------------------------------------------------------------------------------------------------------------------------------------------------------------------------------------------------------------------------------------------------------------------------------------------------------------------------------------------------------------------------------------------|------------------------------------------------------------------------------------------------------------------------------------------------------------------------------------------------------------------------------------------------------------------------------------------------------------------------------------------------------------------------------------------------------------------------------------------------------|--------------------------------------------------------------------------------------------------------------------------------------------------------------------------------------------------------------------------------------------------------------------------------------------------------------------------------------------------------------------------------------------------------------------------------------------------------------------------------|-----------------------------------------------------------------------------------------------------------------------------------------------------------------------------------------------------------------------------------------------------------------------------------------------|
|                                                                                                                                                                                                                                                                                                                                                            |                                                                                                                                                                                                                                                                                                                                                                                                                                               |                                                                                                                                                                                                                                                                                                                                                                                                                                                      | <p>Three symptom clusters (i.e., lung-cancer specific, psychological, nutritional) were relatively stable across both symptom dimensions and across all six timepoints</p> <p>Two symptom clusters (i.e., epithelial/GI, epithelial) varied by time but not symptom dimension</p> <p>Sickness behavior symptom cluster was present across both symptom dimensions at T2 and T3, but was not present at T1 in the severity dimension</p> <p><u>Additional outcomes:</u> N/A</p> |                                                                                                                                                                                                                                                                                               |
| <p>Sullivan et al., 2018</p> <p><u>Purpose(s):</u><br/>Determine the occurrence rates and severity ratings for 38 common symptoms</p> <p>Evaluate for differences in the number and types of symptom clusters</p> <p>Evaluate for changes over time in these symptom clusters</p> <p><u>Design:</u> longitudinal</p> <p><u>Location:</u> United States</p> | <p><math>n = 540</math></p> <p>Mean age: 53.3 (<math>\pm 11.6</math>) years<br/>Range: NR</p> <p>Female: 99.1%</p> <p>Ethnicity and Race:<br/>White 67.0%<br/>Black 6.7%<br/>Asian or Pacific Islander 14.9%<br/>Hispanic, Mixed, or Other 11.4%</p> <p>Employment status:<br/>Working 41.0%<br/>Not working 59.0%</p> <p>Inpatients: <math>n = 0</math><br/>Outpatients: <math>n = 540</math></p> <p>Diagnosis:<br/>Breast cancer 100.0%</p> | <p><u>Instrument(s):</u> MSAS (modified): 38 symptoms</p> <p><u>Criteria used to exclude symptoms:</u> Yes</p> <p><u>Analysis:</u> EFA</p> <p><u>Dimension(s):</u> occurrence, severity</p> <p><u>Symptoms allowed to load on more than one factor:</u> Yes</p> <p><u>Minimum factor loadings required to include symptom within cluster:</u> 0.40</p> <p><u>Method of evaluating for stability of symptoms across symptom dimensions and/or</u></p> | <p>8 symptom clusters identified across the symptom dimensions and timepoints:</p> <p><i>Occurrence symptom clusters</i><br/><b>T1</b><br/><u>Sickness behavior cluster:</u> pain, dry mouth, nausea, feeling drowsy, numbness and/or tingling in hands and/or feet, lack of appetite, dizziness</p> <p><u>Psychological cluster:</u> difficulty concentrating, feeling nervous, feeling sad, worrying, feeling irritable, "I don't look like myself"</p>                      | <p><u>Strengths:</u></p> <p>Large sample size</p> <p>Evaluated for symptom clusters across multiple timepoints</p> <p>Symptom clusters were created using multiple dimensions of the symptom experience</p> <p>Utilized a valid and reliable symptom inventory</p> <p><u>Limitations:</u></p> |

|  |                                                                                                                                                                                                                                               |                                                                                                     |                                                                                                                                                                                                                                                                                                                                                                                                                                                                                                                                                                                                                                                                                                                                                                                                                                                                                                                                                   |  |
|--|-----------------------------------------------------------------------------------------------------------------------------------------------------------------------------------------------------------------------------------------------|-----------------------------------------------------------------------------------------------------|---------------------------------------------------------------------------------------------------------------------------------------------------------------------------------------------------------------------------------------------------------------------------------------------------------------------------------------------------------------------------------------------------------------------------------------------------------------------------------------------------------------------------------------------------------------------------------------------------------------------------------------------------------------------------------------------------------------------------------------------------------------------------------------------------------------------------------------------------------------------------------------------------------------------------------------------------|--|
|  | <p>Treatment:<br/> Adjuvant CTX 74.0%<br/> Neoadjuvant CTX 26.0%</p> <p>Timepoints of symptom assessment:<br/> T1: prior to second or third cycle of CTX<br/> T2: approximately 1 week after CTX<br/> T3: approximately 2 weeks after CTX</p> | <p><u>timepoints</u>: Kirkova and Walsh, 2007</p> <p><u>Analysis of secondary outcomes</u>: N/A</p> | <p><u>Hormonal cluster</u>: hot flashes, sweats</p> <p><u>GI cluster</u>: difficulty sleeping, abdominal cramps, shortness of breath, weight loss</p> <p><u>Weight change cluster</u>: weight gain, weight loss</p> <p><u>Epithelial cluster</u>: weight gain, mouth sores, hair loss, change in the way food tastes, changes in skin</p> <p><b>T2</b></p> <p><u>Psychological cluster</u>: feeling nervous, feeling sad, worrying, feeling irritable, "I don't look like myself"</p> <p><u>Hormonal cluster</u>: hot flashes, difficulty sleeping, sweats, problems with sexual interest or activity</p> <p><u>Nutritional cluster</u>: dry mouth, nausea, lack of appetite, change in the way food tastes, weight loss, abdominal cramps, diarrhea</p> <p><u>GI cluster</u>: weight loss, feeling bloated, weight gain</p> <p><u>Epithelial cluster</u>: "I do not look like myself", change in the way food tastes, hair loss, mouth sores</p> |  |
|--|-----------------------------------------------------------------------------------------------------------------------------------------------------------------------------------------------------------------------------------------------|-----------------------------------------------------------------------------------------------------|---------------------------------------------------------------------------------------------------------------------------------------------------------------------------------------------------------------------------------------------------------------------------------------------------------------------------------------------------------------------------------------------------------------------------------------------------------------------------------------------------------------------------------------------------------------------------------------------------------------------------------------------------------------------------------------------------------------------------------------------------------------------------------------------------------------------------------------------------------------------------------------------------------------------------------------------------|--|

|  |  |  |                                                                                                                                                                                                                                                                                                                                                                                                                                                                                                                                                                                                                                                                                                                                                                                                                                                                                                                                        |  |
|--|--|--|----------------------------------------------------------------------------------------------------------------------------------------------------------------------------------------------------------------------------------------------------------------------------------------------------------------------------------------------------------------------------------------------------------------------------------------------------------------------------------------------------------------------------------------------------------------------------------------------------------------------------------------------------------------------------------------------------------------------------------------------------------------------------------------------------------------------------------------------------------------------------------------------------------------------------------------|--|
|  |  |  | <p><b>T3</b><br/> <u>Hormonal cluster</u>: hot flashes, sweats</p> <p><u>Psychological cluster</u>: worrying, feeling irritable, difficulty concentrating, feeling nervous, feeling drowsy, feeling sad</p> <p><u>GI cluster</u>: abdominal cramps, difficulty sleeping, feeling bloated, weight gain, nausea</p> <p><u>Nutritional cluster</u>: weight gain, nausea, lack of appetite, weight loss, change in the way food tastes</p> <p><u>Epithelial cluster</u>: change in the way food tastes, changes in skin, mouth sores, "I do not look like myself", itching</p> <p><i>Severity symptom clusters</i></p> <p><b>T1</b><br/> <u>Psychological cluster</u>: difficulty concentrating, feeling nervous, feeling sad, worrying, feeling irritable, "I don't look like myself"</p> <p><u>Sickness behavior cluster</u>: pain, dry mouth, nausea, feeling drowsy, dizziness</p> <p><u>Hormonal cluster</u>: sweats, hot flashes</p> |  |
|--|--|--|----------------------------------------------------------------------------------------------------------------------------------------------------------------------------------------------------------------------------------------------------------------------------------------------------------------------------------------------------------------------------------------------------------------------------------------------------------------------------------------------------------------------------------------------------------------------------------------------------------------------------------------------------------------------------------------------------------------------------------------------------------------------------------------------------------------------------------------------------------------------------------------------------------------------------------------|--|

|  |  |  |                                                                                                                                                                                                                                                                                                                                                                                                                                                                                                                                                                                                                                                                                                                                                                                                                                                                                                                                     |  |
|--|--|--|-------------------------------------------------------------------------------------------------------------------------------------------------------------------------------------------------------------------------------------------------------------------------------------------------------------------------------------------------------------------------------------------------------------------------------------------------------------------------------------------------------------------------------------------------------------------------------------------------------------------------------------------------------------------------------------------------------------------------------------------------------------------------------------------------------------------------------------------------------------------------------------------------------------------------------------|--|
|  |  |  | <p><u>GI cluster</u>: feeling bloated, diarrhea, abdominal cramps</p> <p><u>Weight change cluster</u>: lack of appetite, weight gain, weight loss</p> <p><u>Epithelial cluster</u>: "I do not look like myself", weight gain, change in the way food tastes, changes in skin, hair loss</p> <p><b>T2</b></p> <p><u>Hormonal cluster</u>: hot flashes, sweats</p> <p><u>Psychological cluster</u>: feeling sad, feeling nervous, worrying, feeling irritable</p> <p><u>CTX-neuropathy cluster</u>: feeling drowsy, numbness in hands and/or feet, pain</p> <p><u>GI cluster</u>: feeling bloated, abdominal cramps, weight gain</p> <p><u>Nutritional cluster</u>: weight gain, weight loss, nausea, lack of appetite</p> <p><u>Epithelial cluster</u>: hair loss, change in the way food tastes, "I do not look like myself", changes in skin, mouth sores</p> <p><b>T3</b></p> <p><u>Hormonal cluster</u>: hot flashes, sweats</p> |  |
|--|--|--|-------------------------------------------------------------------------------------------------------------------------------------------------------------------------------------------------------------------------------------------------------------------------------------------------------------------------------------------------------------------------------------------------------------------------------------------------------------------------------------------------------------------------------------------------------------------------------------------------------------------------------------------------------------------------------------------------------------------------------------------------------------------------------------------------------------------------------------------------------------------------------------------------------------------------------------|--|

|                                                                     |                                           |                                                |                                                                                                                                                                                                                                                                                                                                                                                                                                                                                                                                                                                                                                                                                                                                                                                                                                                                     |                                                                                 |
|---------------------------------------------------------------------|-------------------------------------------|------------------------------------------------|---------------------------------------------------------------------------------------------------------------------------------------------------------------------------------------------------------------------------------------------------------------------------------------------------------------------------------------------------------------------------------------------------------------------------------------------------------------------------------------------------------------------------------------------------------------------------------------------------------------------------------------------------------------------------------------------------------------------------------------------------------------------------------------------------------------------------------------------------------------------|---------------------------------------------------------------------------------|
|                                                                     |                                           |                                                | <p><u>Psychological cluster</u>: difficulty concentrating, feeling nervous, feeling sad, feeling drowsy, worrying, feeling irritable</p> <p><u>GI cluster</u>: feeling bloated, abdominal cramps, weight gain</p> <p><u>Nutritional cluster</u>: weight gain, nausea, lack of appetite, weight loss, change in the way food tastes</p> <p><u>Epithelial cluster</u>: change in the way food tastes, mouth sores, hair loss, "I don't look like myself", changes in skin</p> <p><u>Changes in symptom clusters over time</u>:</p> <p>Five symptom clusters (i.e., psychological, hormonal, nutritional, GI, epithelial) were relatively stable across both symptom dimensions and across all six timepoints</p> <p>Two symptom clusters (i.e., sickness behavior, weight change) varied by time but not symptom dimension</p> <p><u>Additional outcomes</u>: N/A</p> |                                                                                 |
| Wiggenraad et al., 2020                                             | n = 60 (total sample n=206)               | <u>Instrument(s)</u> : MSAS: 32 symptoms       | 3 symptom clusters identified across each timepoint for the control group:                                                                                                                                                                                                                                                                                                                                                                                                                                                                                                                                                                                                                                                                                                                                                                                          | <u>Strengths</u> :<br>Evaluated for symptom clusters across multiple timepoints |
| <u>Purpose(s)</u> :<br>Evaluate for longitudinal changes in symptom | Mean age: 53.3 (±10.0) years<br>Range: NR | <u>Criteria used to exclude symptoms</u> : Yes |                                                                                                                                                                                                                                                                                                                                                                                                                                                                                                                                                                                                                                                                                                                                                                                                                                                                     |                                                                                 |

|                                                                                                                                          |                                                                                                                                                                                                                                                                                                                                                                                                                           |                                                                                                                                                                                                                                                                                                                                                                                                                                                                                             |                                                                                                                                                                                                                                                                                                                                                                                                                                                                                                                                                                                                                                                                                                                                                                                                                                                                                                                                                                                                                         |                                                                                                                                                                                                                                                                                                        |
|------------------------------------------------------------------------------------------------------------------------------------------|---------------------------------------------------------------------------------------------------------------------------------------------------------------------------------------------------------------------------------------------------------------------------------------------------------------------------------------------------------------------------------------------------------------------------|---------------------------------------------------------------------------------------------------------------------------------------------------------------------------------------------------------------------------------------------------------------------------------------------------------------------------------------------------------------------------------------------------------------------------------------------------------------------------------------------|-------------------------------------------------------------------------------------------------------------------------------------------------------------------------------------------------------------------------------------------------------------------------------------------------------------------------------------------------------------------------------------------------------------------------------------------------------------------------------------------------------------------------------------------------------------------------------------------------------------------------------------------------------------------------------------------------------------------------------------------------------------------------------------------------------------------------------------------------------------------------------------------------------------------------------------------------------------------------------------------------------------------------|--------------------------------------------------------------------------------------------------------------------------------------------------------------------------------------------------------------------------------------------------------------------------------------------------------|
| <p>clusters and core burdensome symptoms in breast cancer patients</p> <p><u>Design:</u> longitudinal</p> <p><u>Location:</u> Sweden</p> | <p>Female: 100.0%</p> <p>Ethnicity: NR</p> <p>Race: NR</p> <p>Employment status:<br/>Employed 80.3%<br/>Not employed 19.7%</p> <p>Inpatients: NR<br/>Outpatients: NR</p> <p>Diagnosis:<br/>Breast cancer 100.0%</p> <p>Treatment:<br/>Adjuvant CTX 100.0%</p> <p>Timepoints of symptom assessment:<br/>T1: 1 week prior to 2<sup>nd</sup> CTX treatment (baseline)<br/>T2: 16 weeks post-T1<br/>T3: 12-months post-T1</p> | <p><u>Analysis:</u> PCA</p> <p><u>Dimension(s):</u> symptom burden (calculated as the average of the frequency, severity, and distress scores of each symptom)</p> <p><u>Symptoms allowed to load on more than one factor:</u> No</p> <p><u>Minimum factor loadings required to include symptom within cluster:</u> 0.50</p> <p><u>Method of evaluating for stability of symptoms across symptom dimensions and/or timepoints:</u> NR</p> <p><u>Analysis of secondary outcomes:</u> N/A</p> | <p><b>T1</b><br/><u>Emotional cluster:</u> feeling nervous, lack of appetite, feeling sad, feeling irritable, pain, difficulty sleeping, shortness of breath, "I don't look like myself"</p> <p><u>Treatment-related toxicity cluster:</u> lack of energy, difficulty concentrating, feeling bloated, diarrhea, worrying, feeling drowsy, nausea</p> <p><u>Physical cluster:</u> hair loss, changes in the way food tastes, sweats</p> <p><b>T2</b><br/><u>Emotional cluster:</u> feeling irritable, swelling of arms or legs, problems with sexual interest or activity, sweats, feeling bloated, feeling sad, worrying, numbness</p> <p><u>Treatment-related toxicity cluster:</u> lack of appetite, dry mouth, changes in the way food tastes, changes in skin</p> <p><u>Physical cluster:</u> difficulty sleeping, feeling drowsy, "I don't look like myself", difficulty concentrating, lack of energy</p> <p><b>T3</b><br/><u>Emotional cluster:</u> lack of energy, feeling nervous, feeling sad, difficulty</p> | <p>Symptom clusters were created using symptom burden</p> <p>Used a valid and reliable symptom measure</p> <p><u>Limitations:</u></p> <p>Patients were recruited from a single hospital</p> <p>Small sample size</p> <p>Did not use a method to assess for stability of symptoms across timepoints</p> |
|------------------------------------------------------------------------------------------------------------------------------------------|---------------------------------------------------------------------------------------------------------------------------------------------------------------------------------------------------------------------------------------------------------------------------------------------------------------------------------------------------------------------------------------------------------------------------|---------------------------------------------------------------------------------------------------------------------------------------------------------------------------------------------------------------------------------------------------------------------------------------------------------------------------------------------------------------------------------------------------------------------------------------------------------------------------------------------|-------------------------------------------------------------------------------------------------------------------------------------------------------------------------------------------------------------------------------------------------------------------------------------------------------------------------------------------------------------------------------------------------------------------------------------------------------------------------------------------------------------------------------------------------------------------------------------------------------------------------------------------------------------------------------------------------------------------------------------------------------------------------------------------------------------------------------------------------------------------------------------------------------------------------------------------------------------------------------------------------------------------------|--------------------------------------------------------------------------------------------------------------------------------------------------------------------------------------------------------------------------------------------------------------------------------------------------------|



|  |  |  |                                                                                                                                                                                                                                                                                                                                                                                                                                                                                                                                                                        |  |
|--|--|--|------------------------------------------------------------------------------------------------------------------------------------------------------------------------------------------------------------------------------------------------------------------------------------------------------------------------------------------------------------------------------------------------------------------------------------------------------------------------------------------------------------------------------------------------------------------------|--|
|  |  |  | <p>concentrating, feeling irritable, pain</p> <p><u>Treatment-related toxicity cluster</u>: numbness, sweats</p> <p><u>Physical cluster</u>: dry mouth, difficulty sleeping</p> <p><u>Changes in symptom clusters over time</u>:</p> <p>Three symptom clusters were discovered at each timepoint</p> <p>However, the symptoms within two of the symptom clusters (i.e., treatment-related, physical) were not stable</p> <p>Symptoms within only one cluster (i.e., emotional) remained relatively stable across timepoints</p> <p><u>Additional outcomes</u>: N/A</p> |  |
|--|--|--|------------------------------------------------------------------------------------------------------------------------------------------------------------------------------------------------------------------------------------------------------------------------------------------------------------------------------------------------------------------------------------------------------------------------------------------------------------------------------------------------------------------------------------------------------------------------|--|

Abbreviations: ALL = acute lymphoblastic leukemia; AML = acute myeloid leukemia; ASA = American Society of Anesthesiologists; CTX = chemotherapy; CIPN = chemotherapy-induced peripheral neuropathy; EFA = exploratory factor analysis; FACIT-F = Functional assessment of Chronic Illness Therapy-Fatigue; FACT = Functional Assessment of Cancer Therapy; FEC = 5-fluorouracil, epirubicin, and cyclophosphamide; FSIS = Female Sexual Function Index; GI = gastrointestinal; HADS = Hospital Anxiety and Depression Scale; MDASI = M.D. Anderson Symptom Instrument; MSAS = Memorial Symptom Assessment Scale; NR = not reported; NRS = Numeric Rating Scale; PCA = principle component analysis; PSQI = Pittsburgh Sleep Quality Index; QOL = quality of life; SES = Symptom Experience Scale; TSO = Treatment-Specific Optimism
